# Supplementary material for: Environments that Induce Synthetic Microbial Ecosystems
Source: PLOS journal article supplement (doi:10.1371/journal.pcbi.1001002), 2010-11-18
Supplement: S3 (10.1371/journal.pcbi.1001002.s003) [file journal.pcbi.1001002.s003]

# A Commensalism-Inducing Media (Lys- → Ade-)

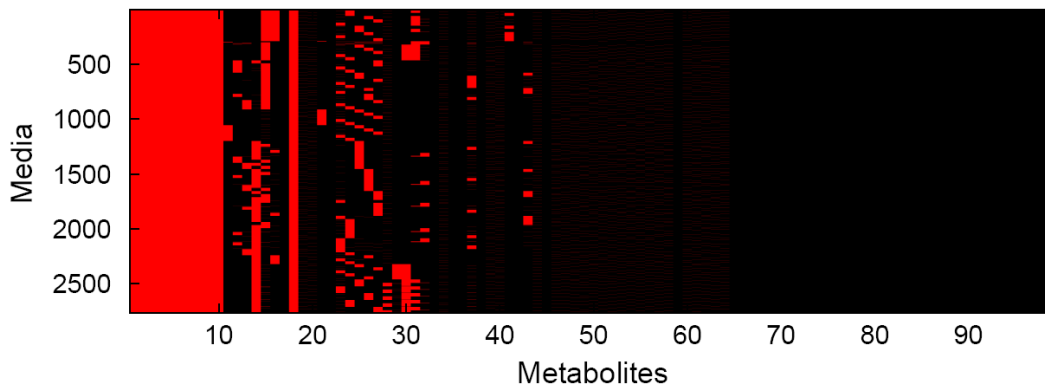

# B

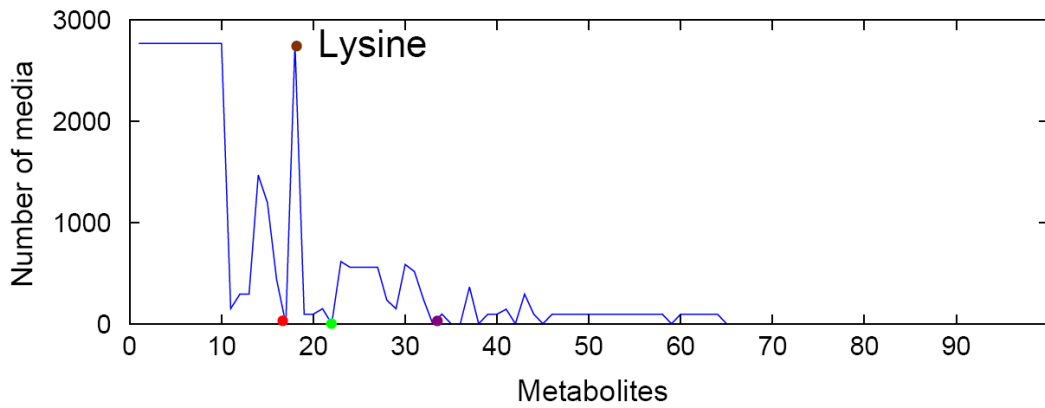

# C Commensalism-Inducing Media (Ade- → Lys -)

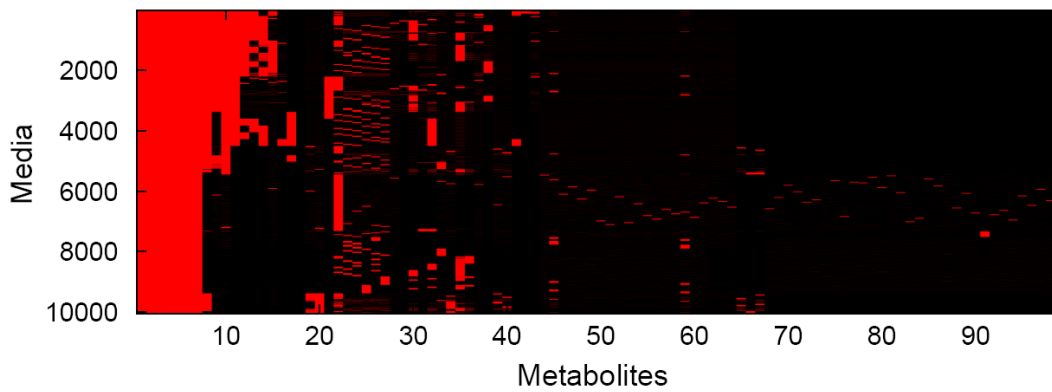

# D

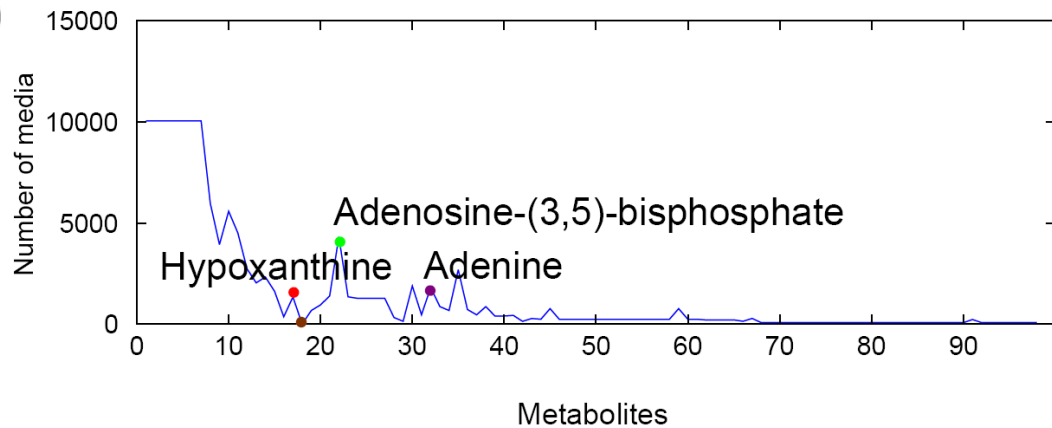

### **Figure S3**

Metabolite usage predicted for the pair of engineered yeast strains in media that induce commensal interactions. Metabolites in all panels of this figure are clustered according to their presence in all media analyzed (see Methods).

**A** Binary map of metabolite usage (black = not used; red = used) across all (Lys-  $\Rightarrow$  Ade-) commensal- inducing media. A large set of metabolites is used in different combinations, forming a complex map of mutual capacities to compensate each other.

**B** By looking at the overall frequency of metabolite usage across all (Lys-  $\Rightarrow$  Ade-) commensalism-inducing media, one can see that lysine is always present, as expected, while adenine derivative metabolites are absent.

**C** The binary map (as in A) for all (Ade-  $\Rightarrow$  Lys- ) commensal-inducing media.

**D** Frequency of metabolites across all (Ade-  $\Rightarrow$  Lys- ) commensalism-inducing media. These media never contain the lysine, but do contain many adenine derivatives as is expected.
