# Supplementary material for: Environments that Induce Synthetic Microbial Ecosystems
Source: PLoS Comput Biol. 2010 Nov 18;6(11):e1001002. doi: 10.1371/journal.pcbi.1001002 (PMC2987903; doi:10.1371/journal.pcbi.1001002)
Supplement: Table S1 — Number of media that induce each possible class of interaction for every pair of microbes. (0.01 MB XLS) [file pcbi.1001002.s007.xls]

## Sheet: Sheet1
Table S1
This table lists the number of media that induce each possible class of interaction for every pair of microbes A (column) and B (rows). The numbers reported here are the same one represented as pie charts in Fig. 6. The four numbers for each pair represent the number of media for each interaction class, in the following order: commensalism (A=>B), commensalism ( B=>A ), neutralism( A;B ), and mut…
	M.extorquens	E.coli	B.subtillis	M.barkeri	S.oneidensis	S.typhimurium	H.pylori
M.extorquens	na	10949, 3913192, 15500, 621336	3758, 224007, 1628, 177356	3451, 713, 331, 2803	4787, 1542, 217, 5561	3897, 42841, 1070, 50537	2, 0, 2, 0
E.coli	3913192, 10949, 15500, 621336	na	1153785, 8063518, 3699217, 1146492	574409,426,430,16285	6351176, 25093, 7197, 1740984	66373218, 24860162, 111017947, 19440858	28046644, 0, 0, 196954
B.subtillis	224007, 3758, 1628, 177356	8063518, 1153785, 3699217, 1146492	na	19295752, 140, 1858, 837447	583076, 17843, 5595, 663509	3776187, 543064, 239135, 2004456	35, 0, 0, 0
M.barkeri	713, 3451, 331, 2803	426, 574409, 430, 16285	140, 19295752, 1858, 837447	na	0, 1308, 0, 328	732, 4584766, 8900, 3257	0, 0, 0, 1
S.oneidensis	1542, 4787, 217, 5561	25093, 6351176, 7197, 1740984	17843, 583076, 5595, 663509	1308,0,0,328	na	28185, 1004581, 25226, 206263	0, 10, 0, 0
S.typhimurium	42841, 3897, 1070, 50537	24860162, 66373218, 111017947, 19440858	543064, 3776187, 239135, 2004456	4584766, 732, 8900, 3257	1004581, 28185, 25226, 206263	na	0, 64, 0, 0
H.pylori	0, 2, 2, 0	0, 28046644, 0, 196954	0, 35, 0, 0	0, 0, 0, 1	10, 0, 0, 0	64, 0, 0, 0	na
