# Supplementary material for: Environments that Induce Synthetic Microbial Ecosystems
Source: PLoS Comput Biol. 2010 Nov 18;6(11):e1001002. doi: 10.1371/journal.pcbi.1001002 (PMC2987903; doi:10.1371/journal.pcbi.1001002)
Supplement: Table S3 — Possible inferences that one could make from comparing predicted outcomes of interactions during growth on different media with corresponding experimental results. (0.01 MB XLS) [file pcbi.1001002.s009.xls]

## Sheet: Sheet1
	Experimental Results
Predicted Result	Mutualism	Neutralism	Commensalism (A->B)	Commensalism (B->A)	No Growth
Mutualism	Correct Prediction	Both organisms capable of using one or more metabolites previously not known.	Organism A capable of using one or more metabolites previously not known.	Organism B capable of using one or more metabolites previously not known.	One or more metabolites not usable by either organism
Neutralism	Both organisms not capable of using one or more metabolites previously believed known.	Correct Prediction	Organism B not capable of using one or more metabolites previously believed known.	Organism A not capable of using one or more metabolites previously believed known.	One or more metabolites not usable by either organism
Commensalism (A->B)	Organism A not capable of using one or more metabolites previously believed known.	Organism B capable of using one or more metabolites previously not known.	Correct Prediction	Organism B capable of using one or more metabolites previously not known. Organism A capable of using one or more metabolites previously not known.	One or more metabolites not usable by either organism
Commensalism (B->A)	Organism B not capable of using one or more metabolites previously believed known.	Organism A capable of using one or more metabolites previously not known.	Organism A capable of using one or more metabolites previously not known. Organism B capable of using one or more metabolites previously not known.	Correct Prediction	One or more metabolites not usable by either organism
Table S3
Possible inferences that one could make from comparing predicted outcomes of interactions during growth on different media with corresponding experimental results.
