# Supplementary material for: Environments that Induce Synthetic Microbial Ecosystems
Source: PLoS Comput Biol. 2010 Nov 18;6(11):e1001002. doi: 10.1371/journal.pcbi.1001002 (PMC2987903; doi:10.1371/journal.pcbi.1001002)
Supplement: Table S4 — Exchanged metabolites for two mutualism-inducing media for two different interacting pairs of organisms. (0.01 MB XLS) [file pcbi.1001002.s010.xls]

## Sheet: Sheet1
		Metabolites distinct to medium	Metabolites used by organism 1	Metabolites used by organism 2	Metabolites exchanged Org1 to Org2	Metabolites exchanged Org 2 to Org1
Organism pair	(1) S. cerevisiae (2) E. coli	fmn, gua, met-L, zymst	fmn, met-L, so4, zymst	gua, met-L	cys-L, pi	adn
	(1) S. cerevisiae (2) E. coli	met-L, pi, pyr	met-L, pi, pyr	met-L, pi, pyr	cys-L	ser-L
	(1) E. coli (2) H. pylori	butso3, tyrp, urea	butso3, tyrp	urea	ala-D, his-L, ile-L, leu-L, orn, pi, val-L	nh4
	(1) E. coli (2) H. pylori	ade, pi, so4	ade, pi, so4	ade, pi	akg, ala-D, arg-L, etoh, his-L, ile-L, leu-L, nh4, thr-L, val-L	acald, glu-L, orn
	Table S4
	This table describes the exchanged metabolites for two mutualism-inducing media for two different interacting pairs of organisms. For the S. cerevisiae - E. coli pair, we verified that individual species can grow on artificially added nutrients predicted to be provided by the symbiotic partner.
	metabolite key: flavin mononucleotide (fmn); guanine (gua); methionine-L (met-L); zymosterol (zymst); inorganic phosphate (pi); pyruvate (pyr); butanesulfonate (butso3); tyrosine-phosphate (tyrp); urea (urea); adenine (ade); sulphate (so4); cysteine-L(cys-L); alanine-D (ala-D); histamine-L (his-L); ethanol (etoh); arginine-L (arg-L); isoleucine-L (ile-L); leucine-L (leu-L); ammonium (nh4); threon…
